# Supplementary material for: Heterogeneity in a metal–organic framework in situ guides engineering Co@CoO heterojunction for electrocatalytic H2 production in tandem with glucose oxidation
Source: Royal Society of Chemistry journal article supplement (doi:10.1039/d1ta10903k), 2022-01-01
Supplement: d1ta10903k1.pdf [file d1ta10903k1.pdf]

## Electronic Supplementary Information

### **Heterogeneity in a Metal–Organic Framework in-situ Guides Engineering Co@CoO Heterojunction for Electrocatalytic H<sub>2</sub> Production in tandem with Glucose Oxidation**

Mengchen Wu <sup>a</sup>, Jing Zhao <sup>a</sup>, Congling Li <sup>b</sup> and Rui Liu <sup>a\*</sup>

*a. Shanghai Key Lab. of D&A for Metal-Functional Materials, School of  
Materials Science and Engineering, Tongji University, Shanghai 201804,  
China*

*Email: ruiliu@tongji.edu.cn*

*b. College of Chemistry and Chemical Engineering, Shanghai University of  
Engineering Science, Shanghai 201620, China*

## **Experimental details**

### **Materials characterization**

The morphology of materials was observed on field emission scanning electron microscope (Hitachi, S-4800) and transmission electron microscope (JEM-2100F). X-ray Diffraction Spectrometry (XRD, D8ADVANCE) with Cu K $\alpha$  line was used to analyze the phase. Fourier transform infrared (FTIR) spectra and X-ray photoelectron spectroscopy (XPS) were conducted on Nicolet NEXUS-470 spectrometer and Axis Ultra DLD, respectively. Nitrogen sorption isotherms were measured by Quadrachrome adsorption instrument (Autosorb-iQ3). BrunauerEmmett-Teller (BET) method and the Barrett-Joyner-Halenda (BJH) model were resorted for the specific surface area and pore size distribution.

### **Electrochemical Measurements**

To prepare the catalyst ink, 10 mg sample was dispersed in 1250  $\mu$ L of ethanol and 30  $\mu$ L of 5% Nafion. 6 $\mu$ L ink was dropped onto the working electrode. The load mass of catalyst was calculated to be 0.23 mg cm<sup>-2</sup>. The Tafel slope was calculated as:  $\eta = b \log(j) + a$ , where  $\eta$ ,  $j$  and  $b$  stand for overpotential, current density, and Tafel slope, respectively.

EIS spectra were tested in a frequency range of 0.1 Hz ~100 kHz. Electrocatalytic stability was assessed by chronoamperometry (CA) method. Electrochemical double layer capacitance ( $C_{dl}$ ) was evaluated by

CV method. Electrochemical active surface area (ECSA) for the catalyst was calculated from  $C_{dl}$  as :  $ECSA = C_{dl}/C_s$ , where  $C_s$  usually takes the value of 20-60  $\mu F cm^{-2}$ .

Before the quantification of  $H_2$ , a known amount (400, 900 and 1600 ppm) of  $H_2$  standard gas was injected into the same cell with the same electrolyte solution volume and head space volume. It was then plotted as a function of the corresponding peak area in GC. Calibration curves were obtained by linear fitting of the as-obtained data points (Fig. S16).

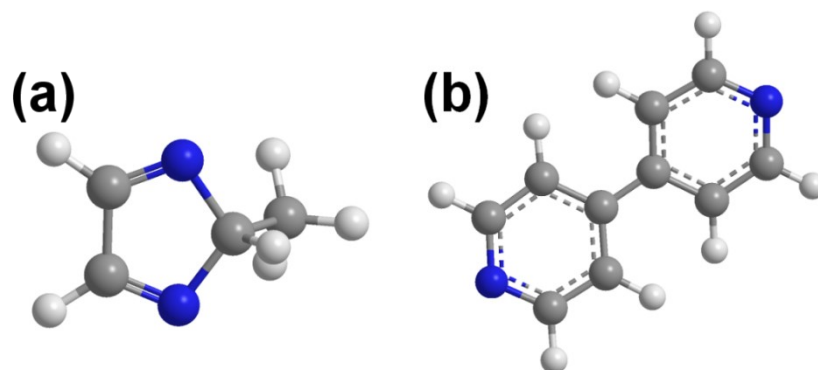

**Fig. S1** Molecular structures of 2-methylimidazole and 4,4'-bipyridine (The N, C and H atoms are marked in blue, gray and white).

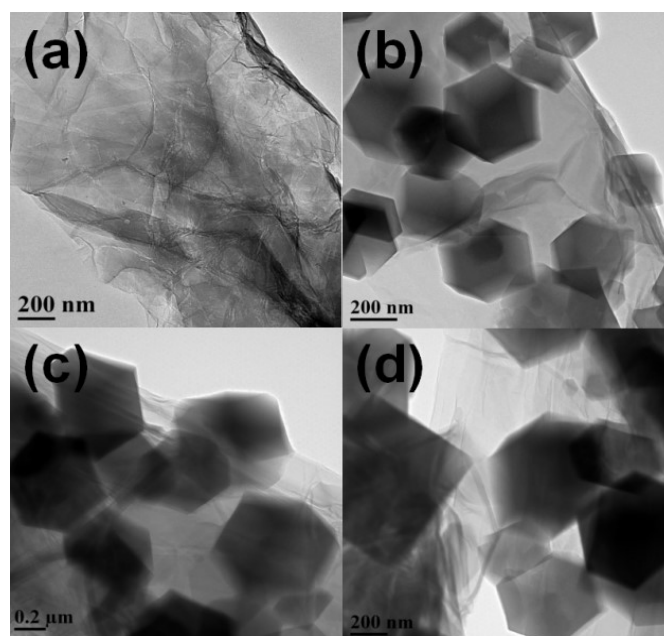

**Fig. S2** TEM images of (a) Co<sup>2+</sup>-Bpy/GO, (b) ZIF-67/GO, (c) ZIF-67-1/GO and (d) ZIF-67-3/GO.

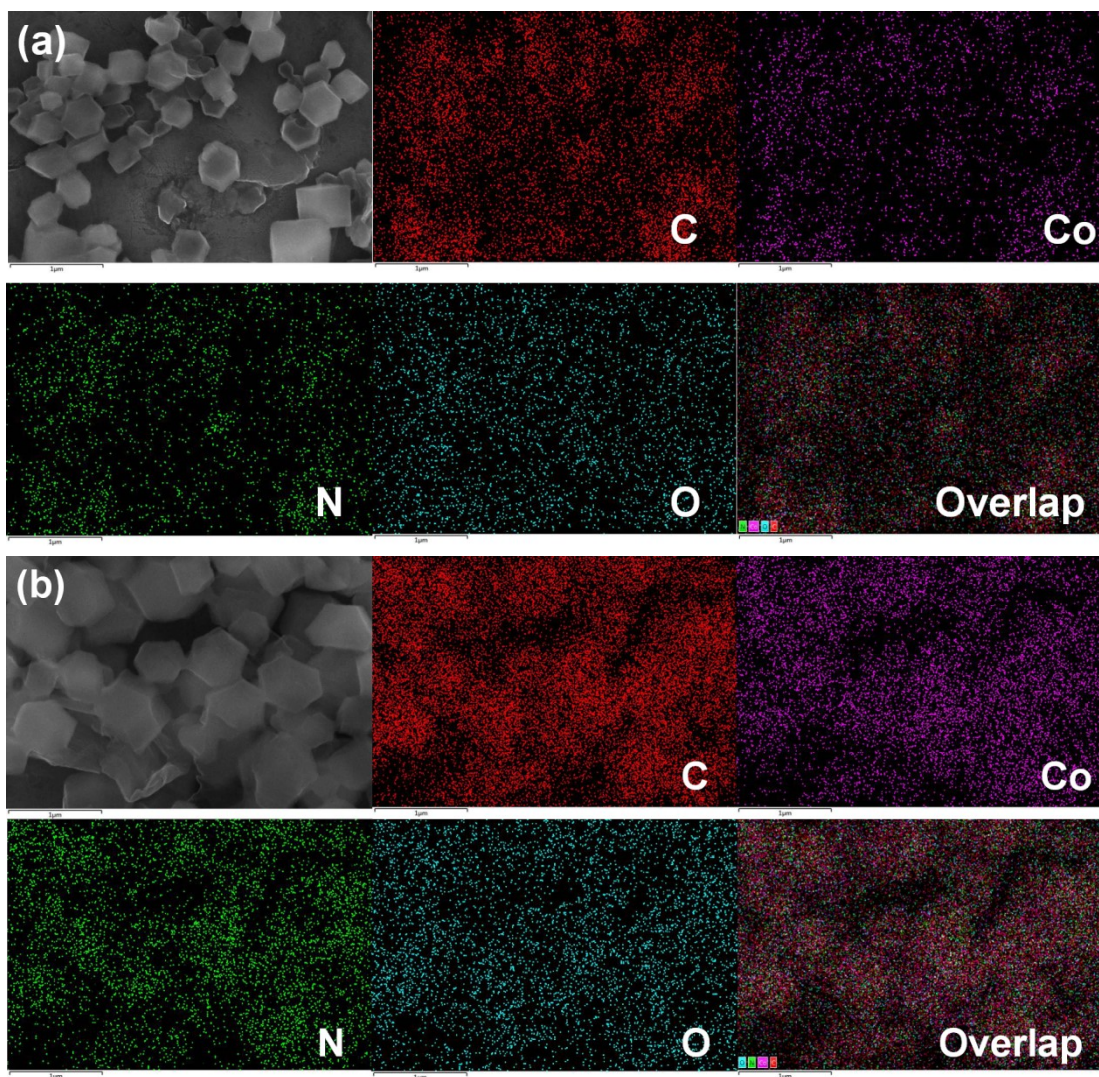

**Fig. S3** SEM and corresponding element mapping images of (a) ZIF-67/GO and (b) ZIF-67-1/GO.

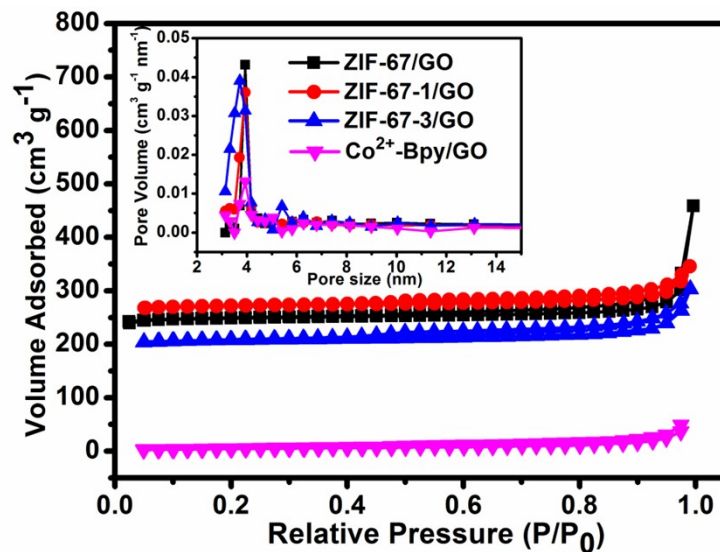

**Fig. S4** N<sub>2</sub> sorption isotherms of ZIF-67/GO, ZIF-67-1/GO, ZIF-67-3/GO and Co<sup>2+</sup>-Bpy/GO (Inset: pore size distribution).

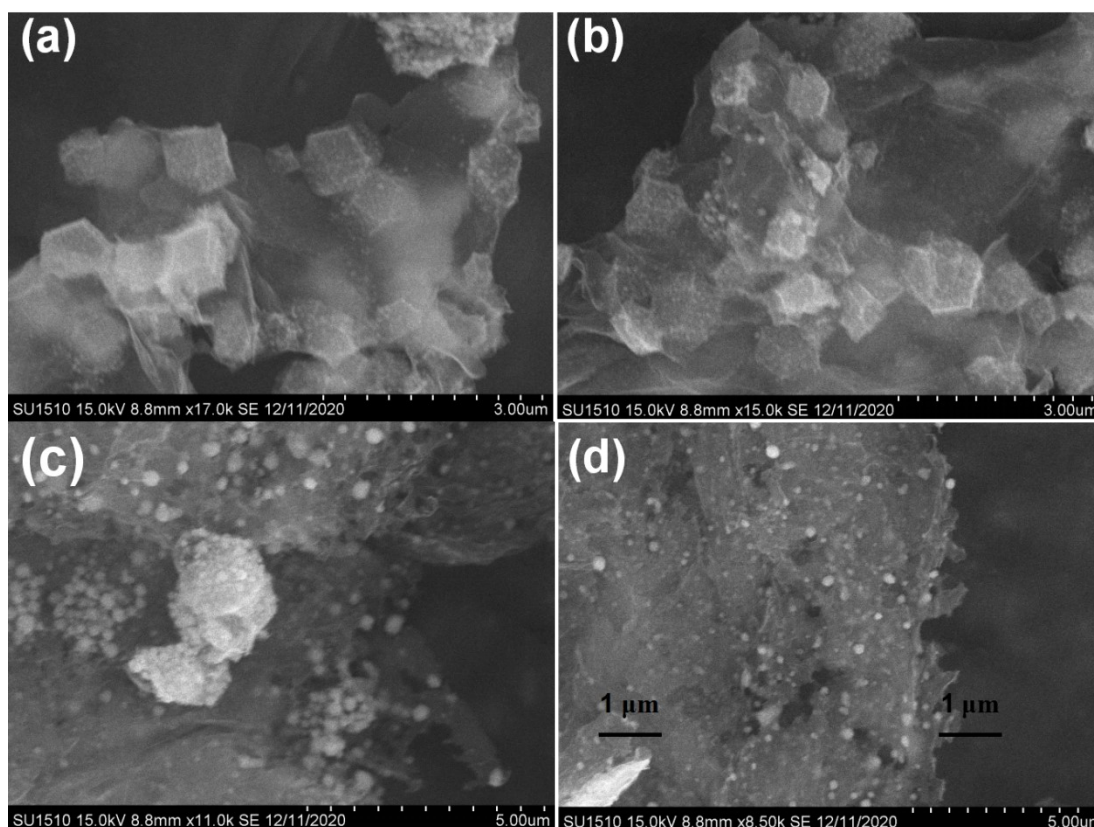

**Fig. S5** SEM images of (a) Co/rGO, (b) Co@CoO-1/rGO, (c) Co@CoO-3/rGO and (d) CoO/rGO.

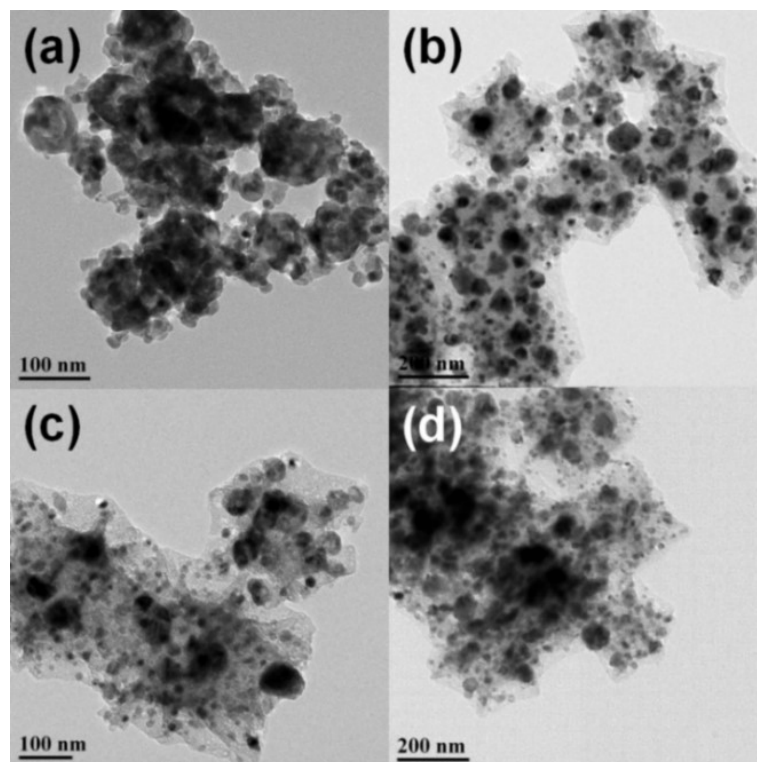

**Fig. S6** TEM images of (a)  $\text{Co}_3\text{O}_4/\text{rGO}$ , and (b-d) corresponding carbon derivatives from ZIF-67, ZIF-67-1 and ZIF-67-3, respectively.

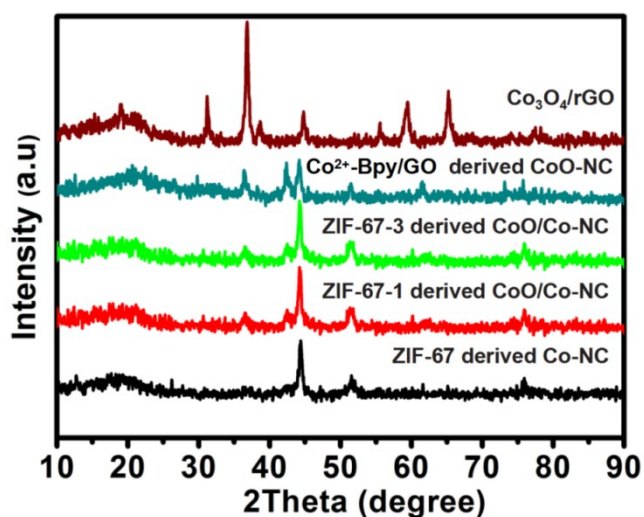

**Fig. S7** XRD patterns of  $\text{Co}_3\text{O}_4/\text{rGO}$  and the carbon derivatives from  $\text{Co}^{2+}$ -Bpy/GO, ZIF-67-3, ZIF-67-1 and ZIF-67, respectively.

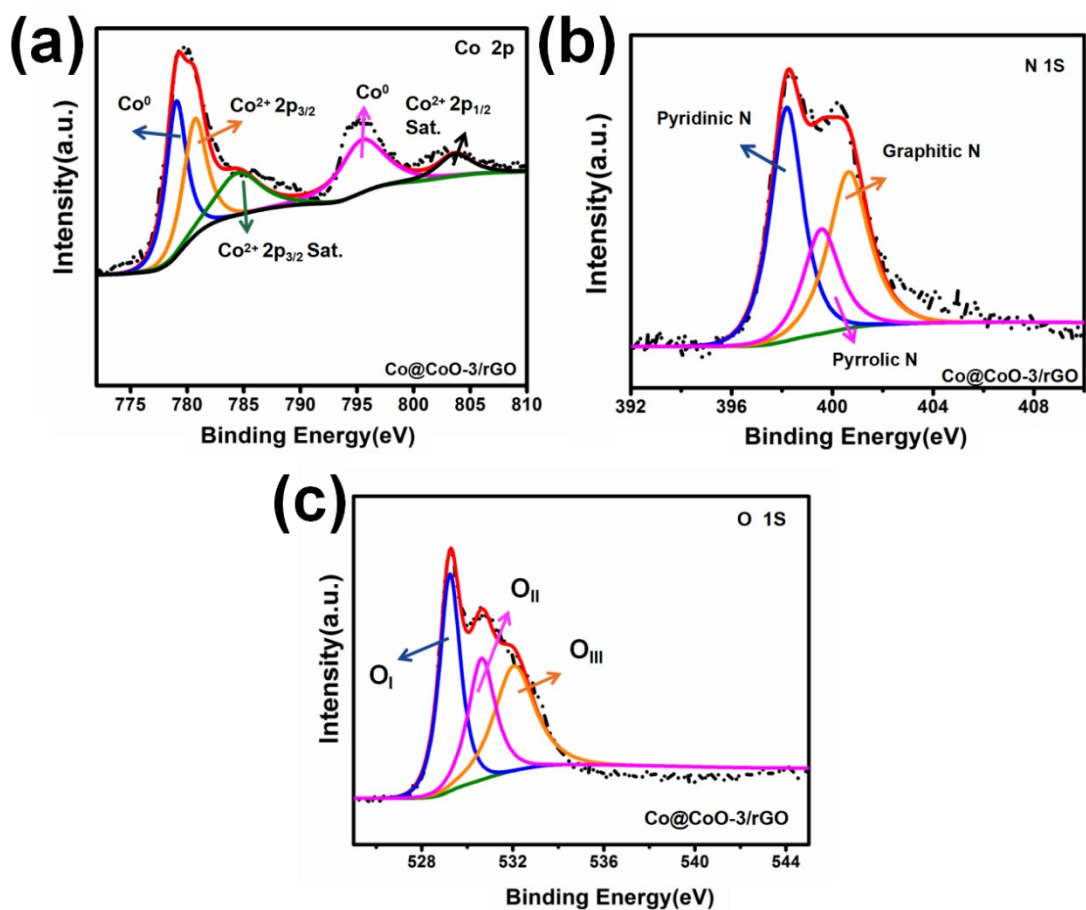

Fig. S8 XPS spectra of (a) Co 2p, (b) N 1s and (c) O 1s in Co@CoO-3/rGO.

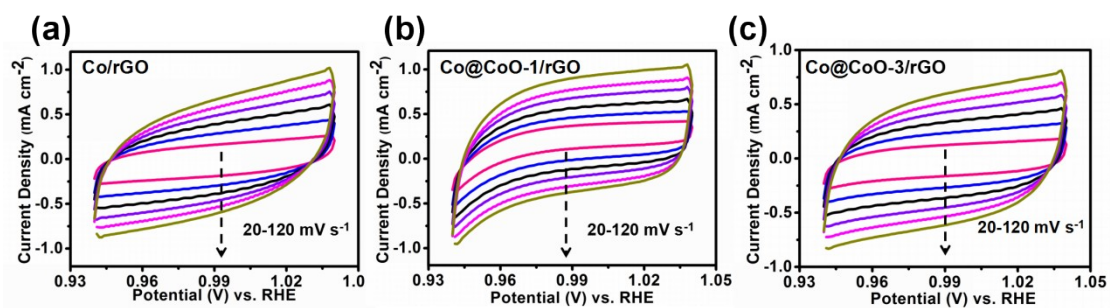

Fig. S9 CV curves of (a) Co/rGO, (b) Co@CoO-1/rGO and (c) Co@CoO-3/rGO at different scan rates.



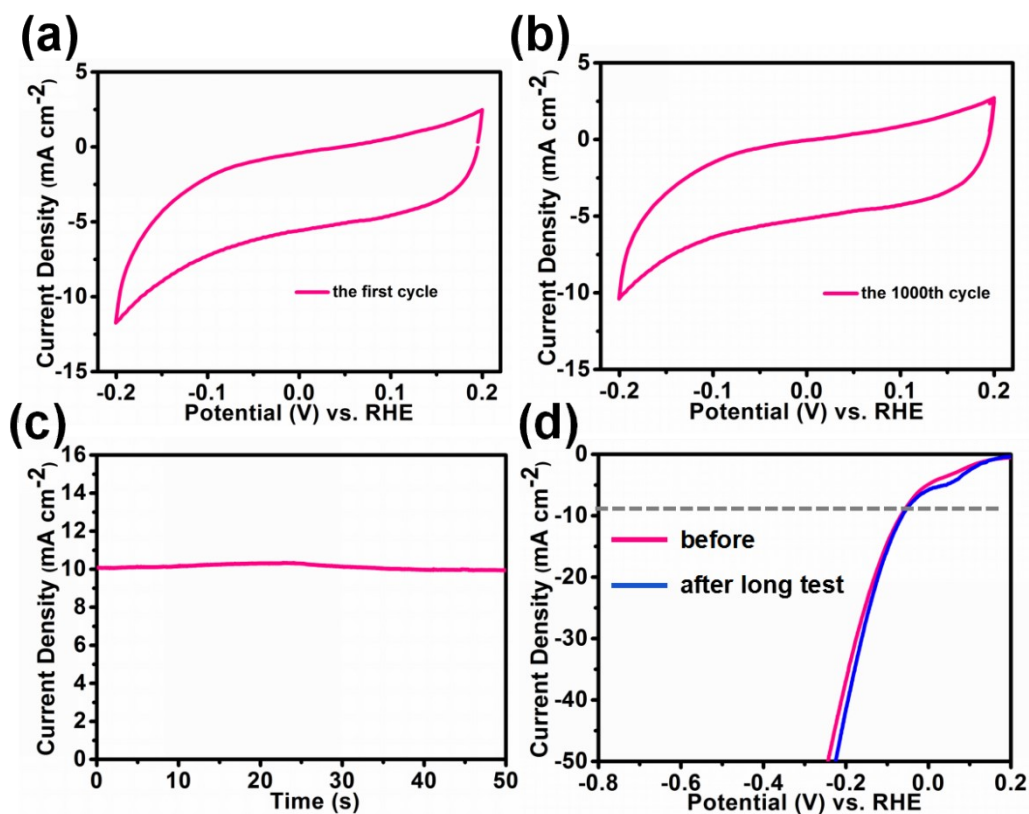

**Fig. S10** (a,b) CV curves of Co@CoO-1/rGO during 1000 cycles, with a potential of 0.2~0.2 V. (c) Stability test by chronoamperometry measurement at overpotential of -0.12 V for Co@CoO-1/rGO. (d) LSV curves of Co@CoO-1/rGO before and after long test.

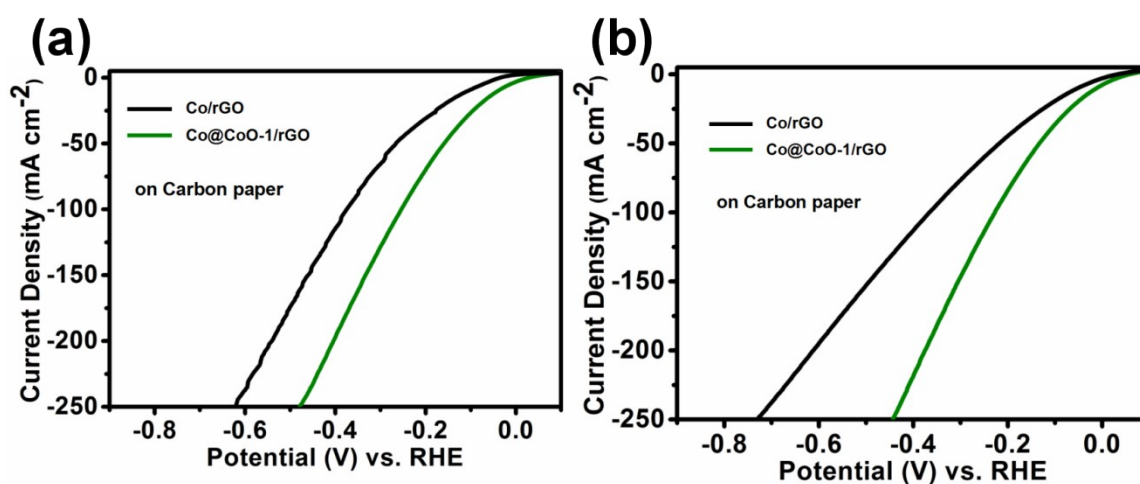

**Fig. S11** Comparison of HER activities of Co@CoO-1/rGO and Co/rGO on carbon paper (a) before and (b) after stability test for 15h.

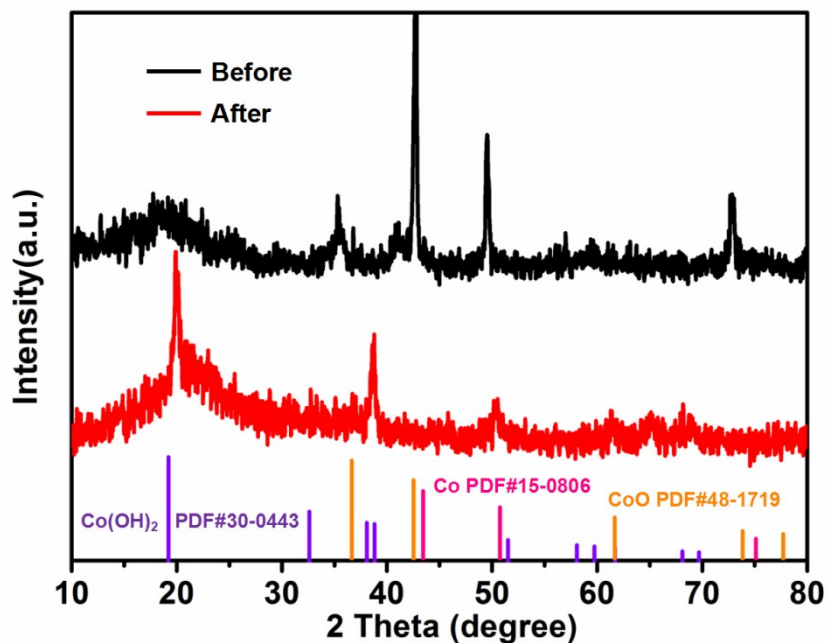

**Fig. S12** Comparison of XRD patterns of Co@CoO-1/rGO before and after HER on carbon paper electrode.

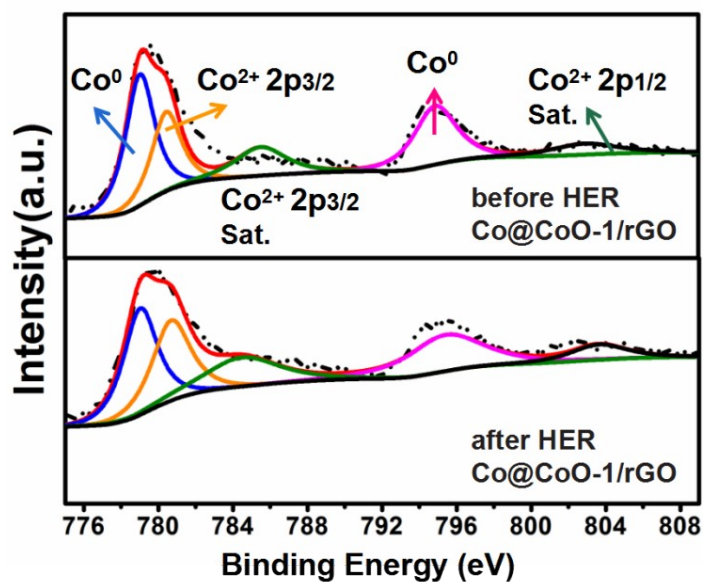

**Fig. S13** Comparison of Co<sub>2p</sub> spectra of Co@CoO-1/rGO before and after HER.

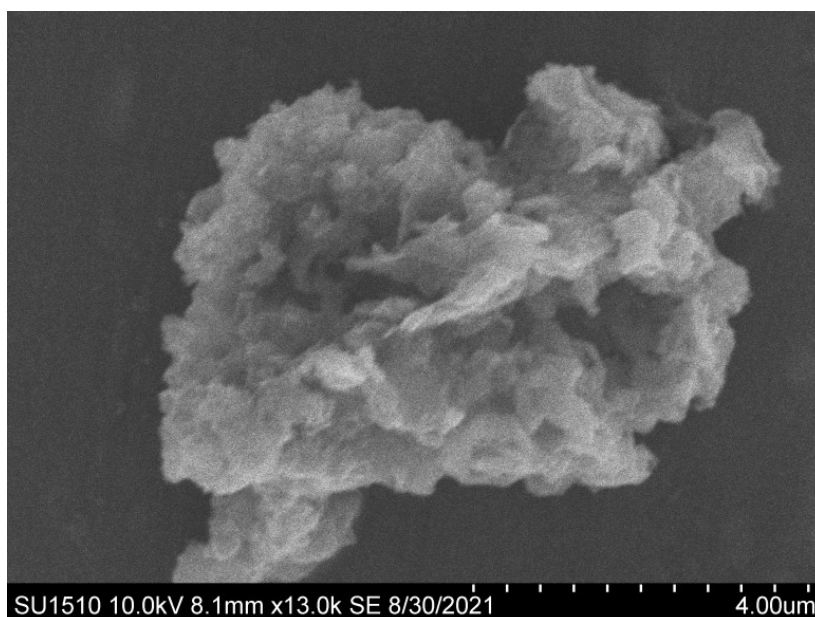

**Fig. S14** SEM image of Co@CoO-1/rGO after HER.

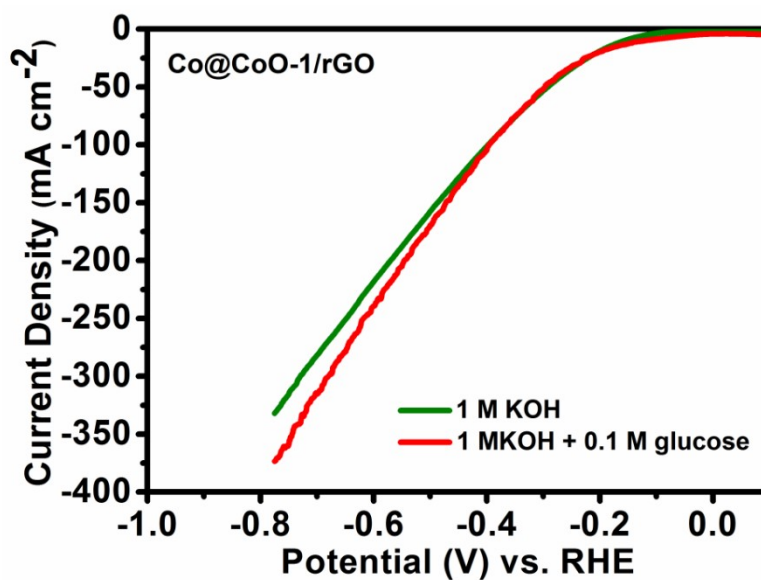

**Fig. S15** LSV curves of Co@CoO-1/rGO in 1 M KOH with and without 0.1M glucose.

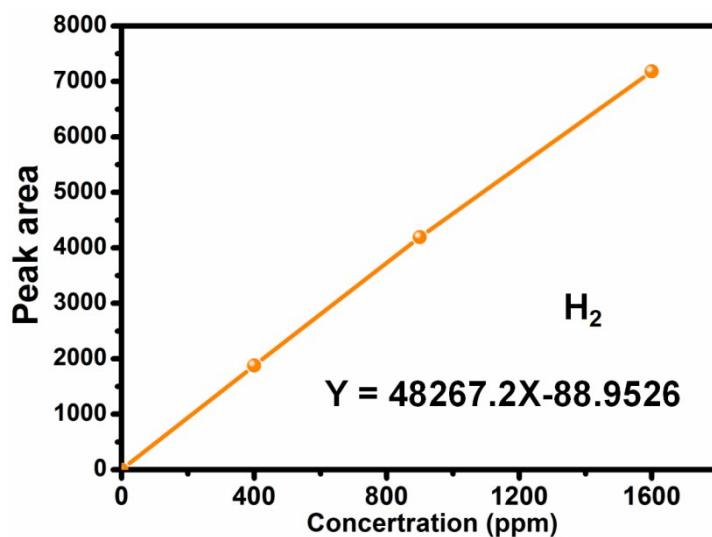

Fig. S16 Calibration curve of H<sub>2</sub>.

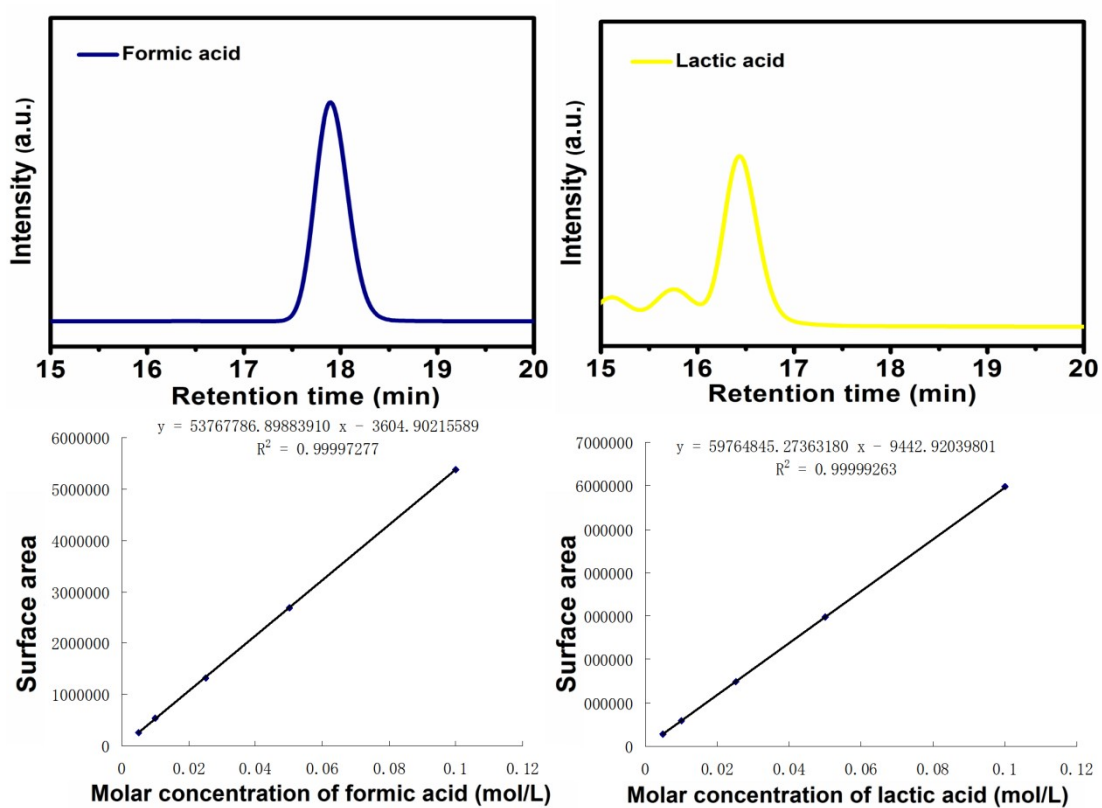

Fig. S17 HPLC measurements of pure lactic acid and formic acid, and their corresponding calibration curve.

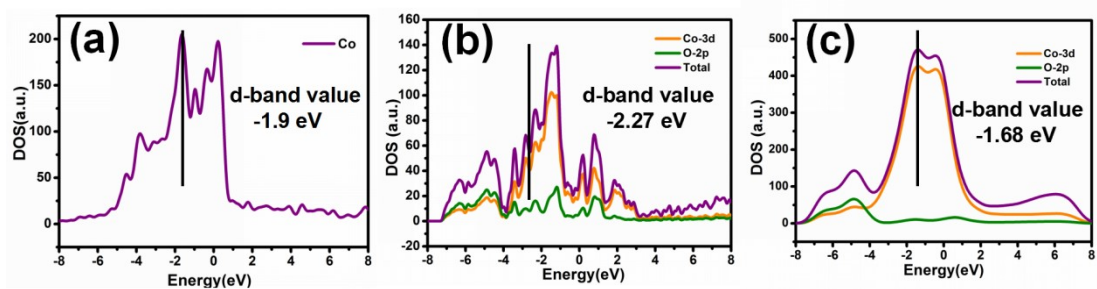

**Fig. S18** Partial electronic density of states calculated for (a) Co, (b) CoO and (c) Co@CoO.

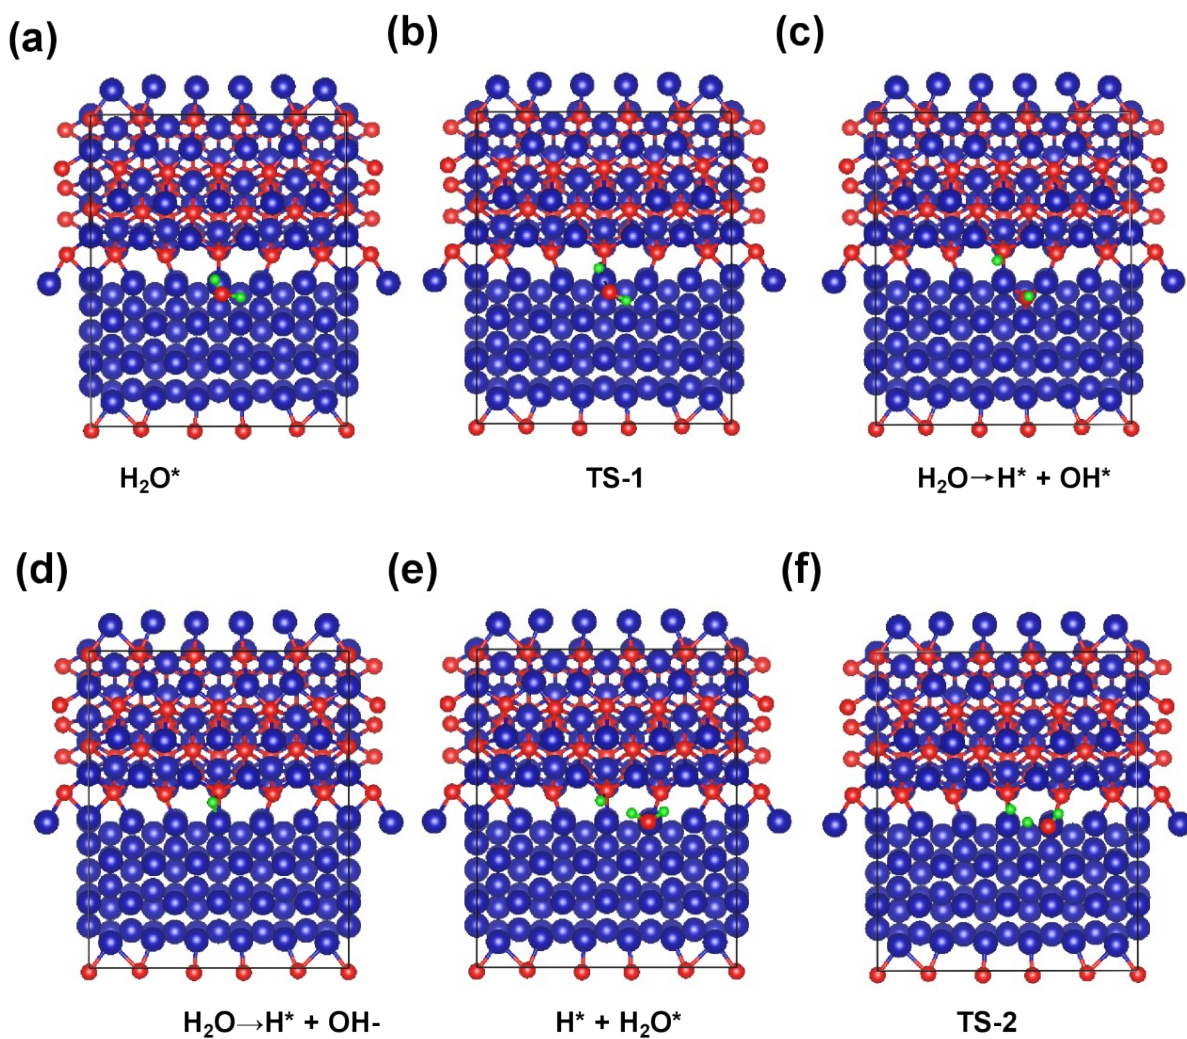

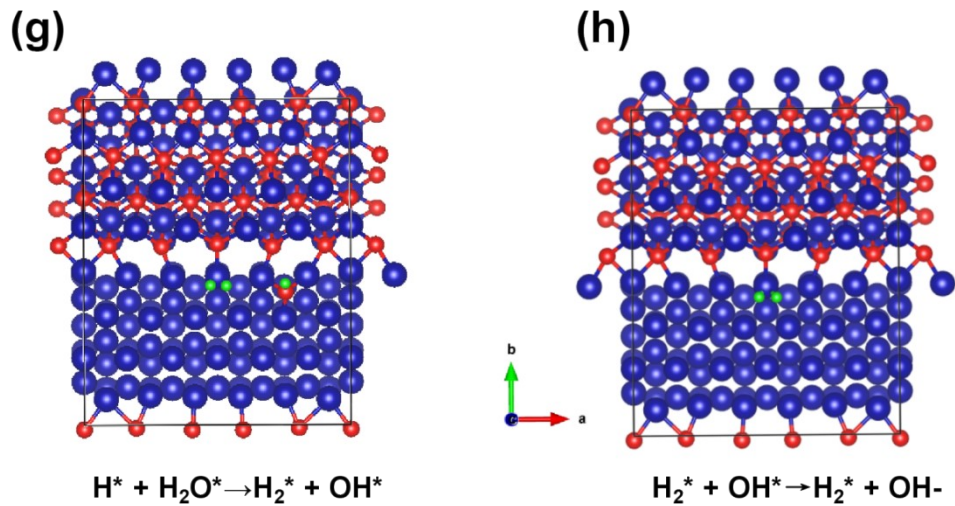

**Fig. S19** (a-h) Adsorbed profiles of CoO during HER process. Co, O and H atoms are marked in blue, red and green.

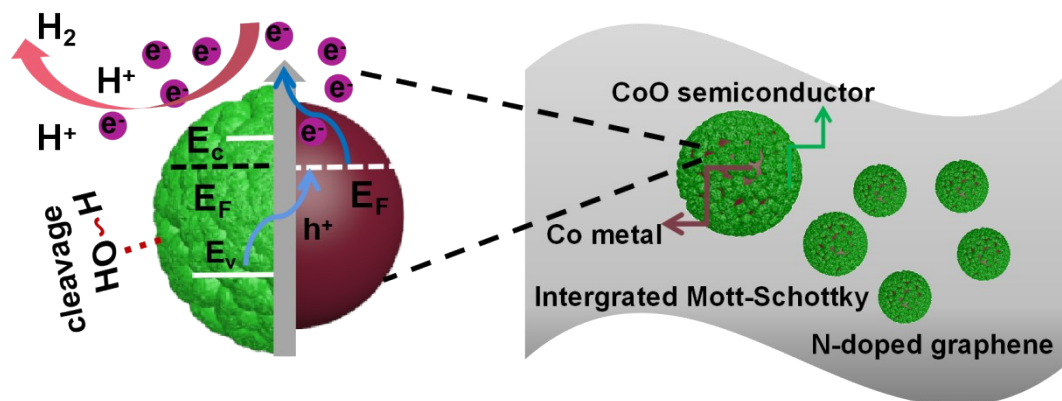

**Fig. S20** Scheme of Volmer-Heyrovsky HER mechanism on Co@CoO Mott-Schottky heterojunctions.

**Table S1** Content comparison (at. % ) of Co@CoO-1/rGO before and after HER.

|            | Co   | O     | N    |
|------------|------|-------|------|
| Before HER | 2.36 | 8.53  | 5.31 |
| After HER  | 2.01 | 14.62 | 5.16 |
